# Supplementary material
Source: Springer Nature journal article supplement (https://www.springermedizin.de/resource/supplementary/12931_2011_1181_MOESM1_ESM.pdf/9425500)

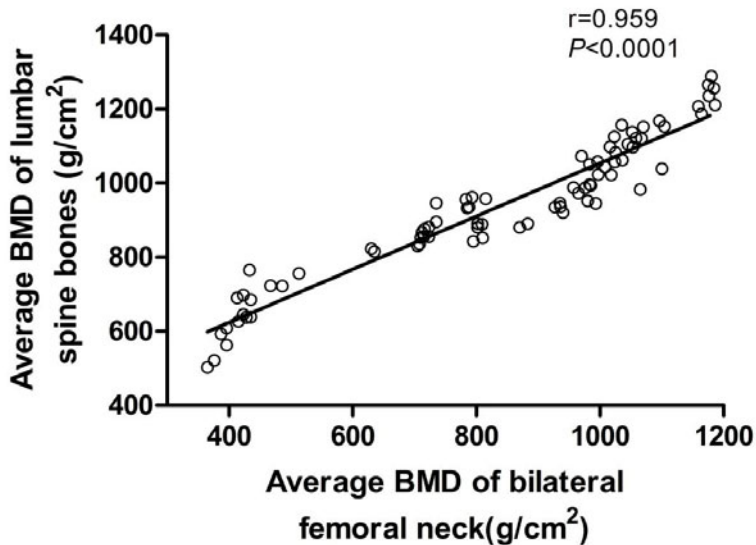

Supplement: MOESM1 [file 9425500]
